# Supplementary material for: Average Rank-Based Score to Measure Deregulation of Molecular Pathway Gene Sets
Source: PubMed Central journal article supplement (PMC3212578; doi:10.1371/journal.pone.0027579), 2011-11-09
Supplement: pone.0027579.s002.pdf [file pone.0027579.s002.pdf]

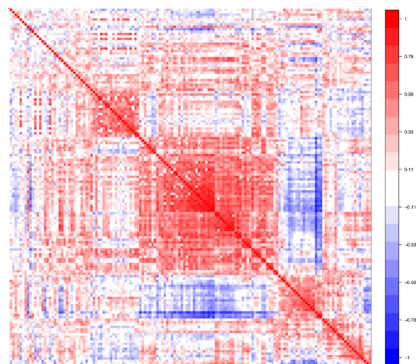

Normal (Su et al.)

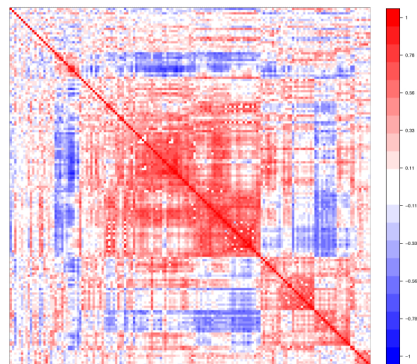

Normal (Roth et al.)

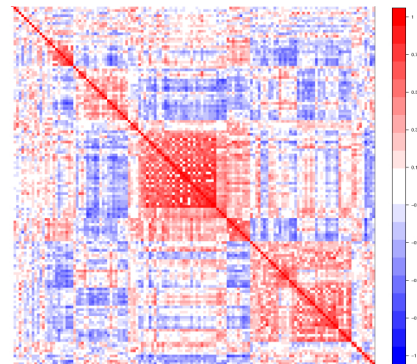

Normal (Ge et al.)

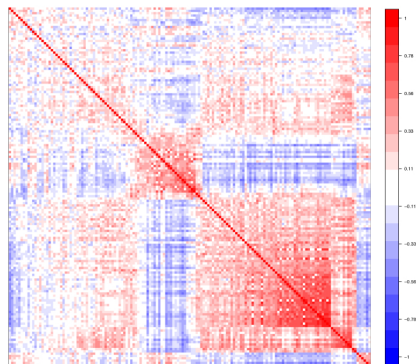

Tumor (Yu et al.)

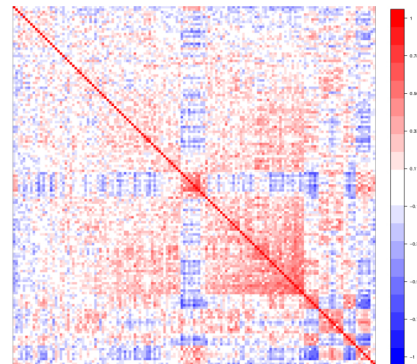

NCI60 cell lines (Shankavaram et al.)
