# Supplementary material for: Average Rank-Based Score to Measure Deregulation of Molecular Pathway Gene Sets
Source: PubMed Central journal article supplement (PMC3212578; doi:10.1371/journal.pone.0027579), 2011-11-09

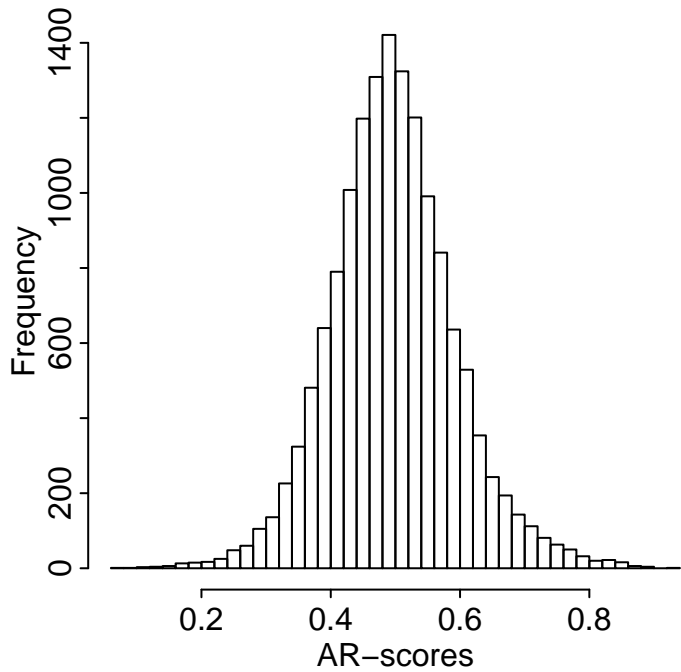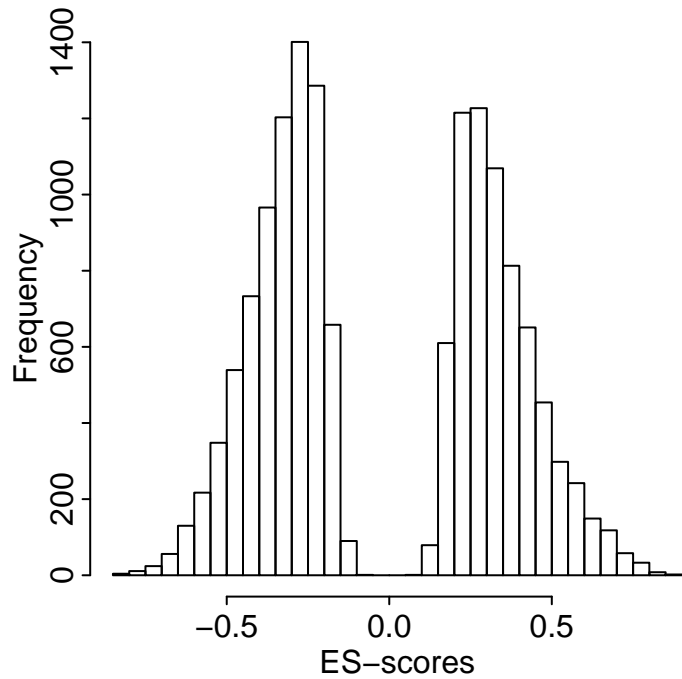

Supplement: pone.0027579.s003.pdf [file pone.0027579.s003.pdf]
